# Supplementary material for: Pharmacological effects of ex vivo mesenchymal stem cell immunotherapy in patients with acute kidney injury and underlying systemic inflammation
Source: PubMed Central journal article supplement — Stem Cells Transl Med. 2021 Sep 28;10(12):1588–601. doi: 10.1002/sctm.21-0043 (PMC8641088; doi:10.1002/sctm.21-0043), 2021-09-28
Supplement: SCT3-10-1588-s004.pdf [file SCT3-10-1588-s004.pdf]

## **SUPPLEMENTARY MATERIALS**

**Fig. S1:** IL-6 measurements in SBI-101 treated participants

**Fig. S2:** Time to treatment inversely correlates with TNF- $\alpha$  reduction.

**Table S1:** Demographic Characteristics (Treated Set)

**Table S2:** Effect sizes of molecular and cellular PD Biomarkers

**Table S3:** Multiplex Panels

**Table S4:** Flow Cytometry Panels

**Materials and Methods:** Exploratory endpoint analysis

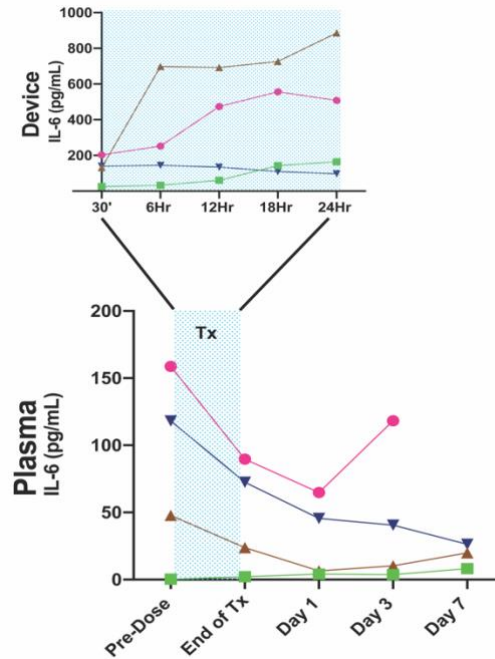

**Fig. S1: IL-6 measurements in SBI-101 treated participants subjects.**

IL-6 was quantified in the plasma of each participant (n=4, green, brown, blue and pink) pre and post treatment as well as in samples taken directly from the SBI-101 device during the 24 hours of treatment. Despite an increase in detectable IL-6 in the MSC microenvironment during treatment, plasma levels of IL-6 seem to decrease post treatment.

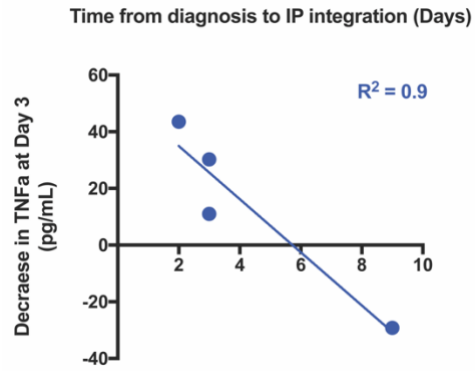

**Fig. S2: Time to treatment inversely correlates with TNF- $\alpha$  reduction.**

TNF- $\alpha$  was measured in plasma of subjects receiving SBI-101 therapy at baseline and at day 3 post treatment. The delta between the two time points was calculated and plotted against time from diagnosis of AKI to integration of SBI-10 (IP- Investigational product). Strong correlation ( $r^2=0.9$ ) indicates that patients that receive SBI-101 soon after their diagnosis may be more likely to have larger reductions of pro-inflammatory cytokines such as TNF- $\alpha$ .

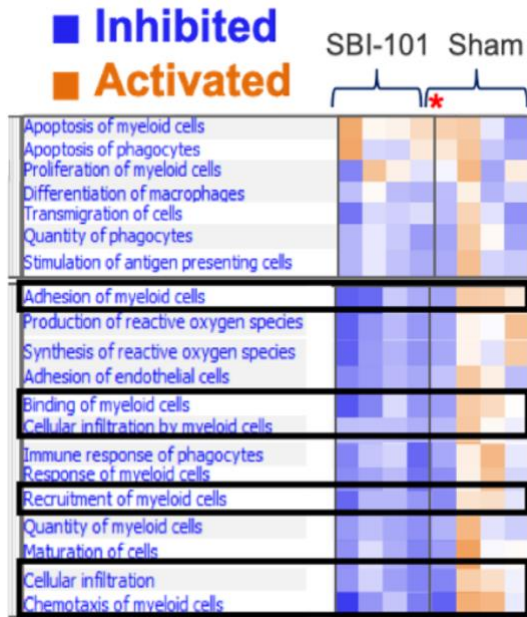

**Fig. S3. Comparison Analysis of Monocyte-related Diseases and Functions of 250M SBI-101 Treated and Sham.**

Disease and Function Analysis Comparison Heatmap was sorted by Hierarchical Clustering based on sample Activation Score. The activation score (Z-score) predicts direction of gene regulation of potential regulators assessing the match of observed and predicted upstream or downstream processes. Z-score serves as both a significance measure and a predictor for the activation state of the regulator (orange, +/-activation, blue, -/inhibition). Monocyte-related Diseases and Functions are highlighted.

**Table S1: Demographic Characteristics (Treated Set)**

|                                   | Low Dose (N=12) | Sham (N=4)   | Overall (N=16) |
|-----------------------------------|-----------------|--------------|----------------|
| <b>Age (years)</b>                |                 |              |                |
| N                                 | 12              | 4            | 16             |
| Mean (SD)                         | 55.9 (9.82)     | 61.1 (19.39) | 57.2 (12.30)   |
| Median                            | 56.3            | 66.2         | 56.7           |
| Q1, Q3                            | 50.1, 62.2      | 47.5, 74.6   | 50.1, 64.2     |
| Min, Max                          | 38.1, 74.2      | 33.9, 77.9   | 33.9, 77.9     |
| <b>Sex, n(%)</b>                  |                 |              |                |
| Male                              | 7 (58.3)        | 1 (25.0)     | 8 (50.0)       |
| Female                            | 5 (41.7)        | 3 (75.0)     | 8 (50.0)       |
| <b>Race, n(%)</b>                 |                 |              |                |
| American Indian/Alaska Native     | 0 (0.0)         | 0 (0.0)      | 0 (0.0)        |
| Asian                             | 0 (0.0)         | 0 (0.0)      | 0 (0.0)        |
| Black/African American            | 2 (16.7)        | 0 (0.0)      | 2 (12.5)       |
| Caucasian/White                   | 10 (83.3)       | 4 (100.0)    | 14 (87.5)      |
| Native Hawaiian/Pacific Islander  | 0 (0.0)         | 0 (0.0)      | 0 (0.0)        |
| Multi-race                        | 0 (0.0)         | 0 (0.0)      | 0 (0.0)        |
| Other                             | 0 (0.0)         | 0 (0.0)      | 0 (0.0)        |
| <b>Ethnicity, n(%)</b>            |                 |              |                |
| Hispanic or Latino                | 1 (8.3)         | 0 (0.0)      | 1 (6.3)        |
| Not Hispanic or Latino            | 11 (91.7)       | 4 (100.0)    | 15 (93.8)      |
| <b>Weight (kg)</b>                |                 |              |                |
| N                                 | 12              | 4            | 16             |
| Mean (SD)                         | 112.9 (30.83)   | 96.1 (23.71) | 108.7 (29.42)  |
| Median                            | 112.4           | 91.2         | 107.4          |
| Q1, Q3                            | 90.2, 132.4     | 78.4, 113.8  | 83.8, 129.0    |
| Min, Max                          | 65.8, 171.2     | 74.2, 127.9  | 65.8, 171.2    |
| <b>Height (cm)</b>                |                 |              |                |
| N                                 | 12              | 4            | 16             |
| Mean (SD)                         | 171.2 (8.49)    | 169.6 (4.87) | 170.8 (7.63)   |
| Median                            | 174.0           | 171.5        | 172.7          |
| Q1, Q3                            | 161.3, 177.8    | 166.4, 172.9 | 162.6, 176.6   |
| Min, Max                          | 160.0, 182.9    | 162.6, 173.0 | 160.0, 182.9   |
| <b>BMI (kg/m<sup>2</sup>)</b>     |                 |              |                |
| N                                 | 12              | 4            | 16             |
| Mean (SD)                         | 38.4 (9.73)     | 33.5 (8.22)  | 37.2 (9.38)    |
| Median                            | 37.2            | 32.7         | 36.3           |
| Q1, Q3                            | 32.6, 45.7      | 26.6, 40.3   | 30.2, 42.6     |
| Min, Max                          | 21.4, 54.2      | 25.6, 42.9   | 21.4, 54.2     |
| <b>Child Bearing Status, n(%)</b> |                 |              |                |
| Yes                               | 1 (8.3)         | 1 (25.0)     | 2 (12.5)       |
| No                                | 4 (33.3)        | 2 (50.0)     | 6 (37.5)       |
| <b>AKI etiology, n(%)</b>         |                 |              |                |

|                                                                      |            |            |            |
|----------------------------------------------------------------------|------------|------------|------------|
| Pre-renal azotemia due to hypovolemia, impaired cardiac output/shock | 8 (66.7)   | 3 (75.0)   | 11 (68.8)  |
| Decreased vascular resistance due to sepsis / anaphylaxis            | 3 (25.0)   | 1 (25.0)   | 4 (25.0)   |
| Renovascular stenosis or occlusion                                   | 0 (0.0)    | 0 (0.0)    | 0 (0.0)    |
| Other                                                                | 4 (33.3)   | 0 (0.0)    | 4 (25.0)   |
| Time from start of CRRT to treatment with IP n(%)                    |            |            |            |
| < 3 Days                                                             | 7 (58.3)   | 2 (50.0)   | 9 (56.3)   |
| > 3 Days                                                             | 5 (41.7)   | 2 (50.0)   | 7 (43.8)   |
| > 5 Days                                                             | 1 (8.3)    | 1 (25.0)   | 2 (12.5)   |
| > 7 Days                                                             | 0 (0.0)    | 0 (0.0)    | 0 (0.0)    |
| Discontinuation from IP due to Clotting                              | 5 (41.7)   | 1 (25.0)   | 6 (37.5)   |
| Time to IP Discontinuation due to Clotting                           |            |            |            |
| N                                                                    | 5          | 1          | 6          |
| Mean (SD)                                                            | 2.6 (1.77) | 10.2 (--)  | 3.8 (3.49) |
| Geometric Mean                                                       | 1.9        | 10.2       | 2.5        |
| Median                                                               | 3.0        | 10.2       | 3.6        |
| Q1, Q3                                                               | 0.8, 4.2   | 10.2, 10.2 | 0.8, 4.3   |
| Min, Max                                                             | 0.6, 4.3   | 10.2, 10.2 | 0.6, 10.2  |

**Table S2: Effect sizes of molecular and cellular PD Biomarkers.**

The most robust PD biomarkers were defined as those with effect sizes greater than one (absolute value). PD biomarkers with effect sizes greater than one on study days 0, 1, 3 or 7.

| Molecular biomarkers |                       |     |                 |
|----------------------|-----------------------|-----|-----------------|
| PD Endpoint          | Direction of Response | Day | TWA Effect Size |
| 6CKine               | Decrease              | 0   | -1.30           |
| B2-Microglobulin     | Increase              | 0   | 1.00            |
|                      |                       | 1   | 1.01            |
|                      |                       | 3   | -1.00           |
| Cathepsin D          | Decrease              | 3   | -1.00           |
|                      |                       | 7   | -1.07           |
|                      |                       | 7   | -1.07           |
| Collagen IV          | Decrease              | 0   | -1.49           |
|                      |                       | 1   | -1.44           |
|                      |                       | 3   | -1.20           |
| CTACK                | Decrease              | 0   | -1.80           |
|                      |                       | 1   | -1.20           |
| Cystatin             | Increase              | 3   | 1.08            |
|                      |                       | 7   | 1.29            |
| Eotaxin              | Increase              | 3   | 1.23            |
|                      |                       | 7   | 1.09            |
| Eotaxin-1            | Decrease              | 1   | -1.25           |
|                      |                       | 3   | -1.09           |
| Flt-3L               | Decrease              | 7   | -1.06           |
|                      |                       | 7   | -1.06           |
| G-CSF                | Increase              | 0   | 2.30            |
|                      |                       | 1   | 1.90            |
|                      |                       | 3   | 1.46            |
| GRO alpha            | Increase              | 0   | 1.14            |
|                      |                       | 1   | 1.02            |
| I-309                | Decrease              | 0   | -1.82           |
|                      |                       | 1   | -1.85           |
|                      |                       | 3   | -1.37           |
| IFNa2                | Decrease              | 0   | -1.15           |
|                      |                       | 1   | -1.07           |
|                      |                       | 3   | -1.35           |
| IFNy                 | Decrease              | 7   | -1.10           |
|                      |                       | 7   | -1.42           |
|                      |                       | 7   | -1.42           |
| IL-10/TNFA           | Increase              | 0   | 1.03            |
|                      |                       | 1   | 1.23            |
|                      |                       | 3   | 1.45            |
| IL-13                | Increase              | 7   | 1.47            |
|                      |                       | 7   | 1.47            |
|                      |                       | 7   | 1.47            |
| IL-15                | Decrease              | 0   | 1.27            |
|                      |                       | 1   | 1.26            |
|                      |                       | 3   | 1.24            |
| IL-15                | Decrease              | 7   | 1.17            |
|                      |                       | 7   | 1.17            |
|                      |                       | 7   | 1.17            |
| IL-3                 | Increase              | 7   | 1.07            |
|                      |                       | 7   | 1.07            |
| IL-5                 | Decrease              | 3   | -1.02           |
|                      |                       | 3   | -1.02           |
| IL-6/IL-10           | Decrease              | 0   | -1.14           |
|                      |                       | 1   | -1.43           |
| KIM-1                | Decrease              | 0   | -1.12           |
|                      |                       | 1   | -1.14           |
|                      |                       | 3   | -1.10           |
| MCP-2                | Decrease              | 0   | -1.31           |
|                      |                       | 1   | -1.79           |
|                      |                       | 3   | -2.23           |
|                      |                       | 7   | -1.74           |
| MCP-3                | Decrease              | 0   | -1.64           |
|                      |                       | 1   | -1.06           |
|                      |                       | 3   | -1.02           |
| Osteoactivin         | Decrease              | 0   | -1.85           |
|                      |                       | 1   | -2.15           |
|                      |                       | 3   | -4.34           |
|                      |                       | 7   | -2.34           |
| PF4                  | Increase              | 0   | 1.73            |
|                      |                       | 1   | 1.00            |
|                      |                       | 7   | 1.00            |
| SDF-1a+B             | Decrease              | 0   | -1.21           |
|                      |                       | 1   | -1.06           |
|                      |                       | 3   | -1.03           |
| sIL-2Ra              | Decrease              | 3   | -1.09           |
|                      |                       | 3   | -1.09           |
| sTNFR1               | Decrease              | 0   | -1.10           |
|                      |                       | 1   | -1.03           |
| sTNFR2               | Decrease              | 0   | -1.34           |
|                      |                       | 1   | -1.18           |
| sVEGFR1              | Increase              | 0   | 1.10            |
|                      |                       | 1   | 1.15            |
|                      |                       | 3   | 1.04            |
|                      |                       | 7   | 1.03            |
| TGF- $\alpha$        | Decrease              | 0   | -1.04           |
| TGF-B1               | Increase              | 7   | 1.04            |
| TGF-B2               | Increase              | 0   | 1.41            |
|                      |                       | 1   | 1.42            |
|                      |                       | 3   | 1.54            |
|                      |                       | 7   | 2.39            |
| TNFA                 | Decrease              | 0   | -1.32           |
|                      |                       | 1   | -1.16           |
|                      |                       | 3   | -1.28           |
|                      |                       | 7   | -1.39           |
| TRAIL                | Decrease              | 3   | -1.51           |
|                      |                       | 7   | -1.29           |

| Cellular biomarkers            |                       |     |                 |
|--------------------------------|-----------------------|-----|-----------------|
| PD Endpoint                    | Direction of Response | Day | TWA Effect Size |
| B Cells (Marginal Zone B)      | Increase              | 3   | 1.03            |
|                                |                       | 7   | 1.26            |
| B Cells (Unswitched Memory)    | Increase              | 3   | 1.16            |
|                                |                       | 7   | 1.55            |
|                                |                       | 7   | 1.55            |
| Dendritic Cells (mDC2)         | Increase              | 1   | 1.48            |
|                                |                       | 3   | 2.41            |
|                                |                       | 7   | 1.07            |
| Dendritic Cells (pDCs)         | Decrease              | 7   | -1.27           |
|                                |                       | 7   | -1.27           |
| Dendritic Cells (Total mDCs)   | Increase              | 7   | 1.00            |
| Monocytes Classical            | Decrease              | 3   | -1.15           |
| Monocytes Intermediate         | Decrease              | 0   | -1.19           |
| Monocytes Non-classical        | Increase              | 0   | 1.46            |
| Monocytes Total                | Decrease              | 1   | 1.07            |
|                                |                       | 3   | -1.14           |
| NK cells (CD56bright CD16low)  | Increase              | 3   | 1.13            |
|                                |                       | 3   | 1.13            |
| NK cells (CD56bright CD8+)     | Increase              | 1   | 1.13            |
|                                |                       | 3   | 1.05            |
| NK cells (CD56dim CD16bright)  | Increase              | 0   | 1.49            |
|                                |                       | 1   | 1.18            |
|                                |                       | 1   | 1.18            |
| NK cells (CD56dim CD8+)        | Increase              | 0   | 1.36            |
| CD4+ T Cells (Central Memory)  | Increase              | 0   | 1.19            |
|                                |                       | 1   | 1.02            |
| CD4+ T Cells (Lag3+)           | Decrease              | 0   | -1.32           |
|                                |                       | 1   | -1.38           |
|                                |                       | 3   | -1.26           |
| CD4+ T Cells (Naive CD38+)     | Increase              | 0   | 1.16            |
| CD8+ T Cells (CD69+)           | Increase              | 1   | 1.02            |
|                                |                       | 3   | 1.17            |
| CD8+ T Cells (Central Memory)  | Increase              | 3   | 1.18            |
|                                |                       | 7   | 1.18            |
|                                |                       | 7   | 1.18            |
| Treg (CD45+ CD4+ CD25- FoxP3+) | Decrease              | 1   | -1.80           |

**Table S3: Multiplex Panels**

| Panel                                         | Eve Technologies Cat # | Analytes                                                                                                                                                                                                                                                                                                                                                                                                                                                                                                                                                                              |
|-----------------------------------------------|------------------------|---------------------------------------------------------------------------------------------------------------------------------------------------------------------------------------------------------------------------------------------------------------------------------------------------------------------------------------------------------------------------------------------------------------------------------------------------------------------------------------------------------------------------------------------------------------------------------------|
| Human Cytokine Array/Chemokine Array 65-Plex  | HD65                   | EGF, Eotaxin, FGF-2, Flt-3 ligand, Fractalkine, G-CSF, GM-CSF, GRO, IFN- $\alpha$ 2, IFN- $\gamma$ , IL-10, IL-12 (p40), IL-12 (p70), IL-13, IL-15, IL-17A, IL-1ra, IL-1 $\alpha$ , IL-1 $\beta$ , IL-2, IL-3, IL-4, IL-5, IL-6, IL-7, IL-8, IL-9, IP-10, MCP-1, MCP-3, MDC (CCL22), MIP-1 $\alpha$ , MIP-1 $\beta$ , PDGF-AA, PDGF-AB/BB, RANTES, TGF $\alpha$ , TNF- $\alpha$ , TNF- $\beta$ , VEGF, sCD40L, Eotaxin-2, MCP-2, BCA-1, MCP-4, I-309, IL-16, TARC, 6CKine, Eotaxin-3, LIF, TPO, SCF, TSLP, IL-33, IL-20, IL-21, IL-23, TRAIL, CTACK, SDF-1a+B, ENA-78, MIP-1d, IL-28A |
| Human TGFb 3-plex                             | TGFB1-3                | TGF-beta 1, 2, and 3                                                                                                                                                                                                                                                                                                                                                                                                                                                                                                                                                                  |
| Human Soluble Cytokine Receptor Array 14-plex | HDSCR14                | sCD30, sEGFR, sgp130, sIL-1RI, sIL-1RII, sIL-2Ra, sIL-4R, sIL-6R, sRAGE, sTNF RI, sTNF RII, sVEGF R1, sVEGF R2, sVEGF R3                                                                                                                                                                                                                                                                                                                                                                                                                                                              |
| Human Supplemental Biomarker Array 10-plex    | HDHSB10                | BDNF, Cathepsin D, MPO, NCAM, PAI-1 (total), PDGF-AA, PDGF-AB/BB, RANTES, sICAM-1, sVCAM-1, Adipsin,                                                                                                                                                                                                                                                                                                                                                                                                                                                                                  |
| Human Cardiovascular Disease Panel 3 5-Plex   | Custom                 | CRP, Fibrinogen, Haptoglobin, PF4, VWF                                                                                                                                                                                                                                                                                                                                                                                                                                                                                                                                                |
| Human Kidney Injury Panel 4                   | Custom                 | Kim-1                                                                                                                                                                                                                                                                                                                                                                                                                                                                                                                                                                                 |
| Human Kidney Injury Panel 5                   | Custom                 | $\alpha$ -1-Microglobulin, Collagen IV, Lipocalin-2/NGAL, Osteoactivin, TIMP-1, Uromodulin                                                                                                                                                                                                                                                                                                                                                                                                                                                                                            |
| Human Kidney Injury Panel 6                   | Custom                 | $\beta$ -2-Microglobulin, Cystatin C                                                                                                                                                                                                                                                                                                                                                                                                                                                                                                                                                  |



**Table S4: Flow Cytometry Panels**

| Panel                                          | Subset                                         | Markers                                 |
|------------------------------------------------|------------------------------------------------|-----------------------------------------|
| B Cells                                        | Total                                          | CD45+ CD19+                             |
|                                                | Regulatory                                     | CD45+ CD19+ CD38+ CD24+                 |
|                                                | Unswitched Memory                              | CD45+ CD19+ IgD+ IgM+ CD27+ CD38-       |
|                                                | Transitional B Cells                           | CD45+ CD19+ IgD+ IgM+ CD27- CD38+ CD24+ |
|                                                | Plasmablasts                                   | CD45+ CD19+ IgD- IgM- CD27+ CD38+       |
|                                                | Switched Memory                                | CD45+ CD19+ IgD- IgM- CD27+ CD38-       |
|                                                | Marginal Zone B                                | CD45+ CD19+ IgD+ CD27+                  |
|                                                | Naïve B Cells                                  | CD45+ CD19+ IgD+ CD27-                  |
| Dendritic Cells                                | Total mDCs                                     | CD45+ Lin- CD11c+                       |
|                                                | mDC1                                           | CD45+ Lin- CD11c+ CD1c+ CD16-           |
|                                                | mDC2                                           | CD45+ Lin- CD11c+ CLEC9A+ CD16-         |
|                                                | CD16+ mDCs                                     | CD45+ Lin- CD11c+ CLEC9A- CD16+         |
|                                                | pDCs                                           | CD45+ Lin- CD11c-CD123+                 |
| Monocytes                                      | Total                                          | 3 monocyte subsets summed               |
|                                                | Classical                                      | CD45+ HLA-DR+ CD14+ CD16-               |
|                                                | Intermediate                                   | CD45+ HLA-DR+ CD14+ CD16+               |
|                                                | Non-classical                                  | CD45+ HLA-DR+ CD14- CD16+               |
| Natural Killer Cells                           | NK T Cells                                     | CD45+ CD56+ CD3low                      |
|                                                | NK T Cells CD3 Bright                          | CD45+ CD56+ CD3bright                   |
|                                                | NK Cells                                       | CD45+ CD56+ CD3-                        |
|                                                | NK CD56bright CD16low                          | CD45+ CD56bright CD16low                |
|                                                | NK CD56bright CD16int                          | CD45+ CD56bright CD16int                |
|                                                | NK CD56dim CD16bright                          | CD45+ CD56dim CD16bright                |
|                                                | NK CD56dim CD8-                                | CD45+ CD56dim CD8-                      |
|                                                | NK CD56dim CD8int                              | CD45+ CD56dim CD8int                    |
|                                                | NK CD56dim CD8+                                | CD45+ CD56dim CD8+                      |
|                                                | NK CD56bright CD8-                             | CD45+ CD56bright CD8-                   |
| NK CD56bright CD8+                             | CD45+ CD56bright CD8+                          |                                         |
| Treg / Th17 Cells                              | Treg CD45+ CD4+ CD25- FoxP3+                   | CD45+ CD4+ CD25- FoxP3+                 |
|                                                | Treg CD45+ CD4+ CD25+ FoxP3low                 | CD45+ CD4+ CD25+ FoxP3low               |
|                                                | Treg CD45+ CD4+ CD25+ FoxP3high                | CD45+ CD4+ CD25+ FoxP3high              |
|                                                | CD45+ CD4+ CD25+                               | CD45+ CD4+ CD25+                        |
|                                                | CD45+ CD4+ CD39+                               | CD45+ CD4+ CD39+                        |
|                                                | CD45+ CD4+ CD127low                            | CD45+ CD4+ CD127low                     |
|                                                | Treg CD45+ CD4+ CD127low FoxP3+                | CD45+ CD4+ CD127low FoxP3+ CD25+        |
| Th17                                           | CD45+ CD4+ ROTgt+                              |                                         |
| T Cells                                        | CD4+ T Cells                                   | CD45+ CD3+ CD4+ CD8-                    |
|                                                | CD8+ T Cells                                   | CD45+ CD3+ CD4- CD8+                    |
|                                                | CD4+ Lag3+                                     | CD45+ CD3+ CD4+ CD8- Lag3+              |
|                                                | CD4+ Lag3-                                     | CD45+ CD3+ CD4+ CD8- Lag3-              |
|                                                | CD8+ Lag3+                                     | CD45+ CD3+ CD4- CD8+ Lag3+              |
|                                                | CD8+ Lag3-                                     | CD45+ CD3+ CD4- CD8+ Lag3-              |
|                                                | CD4+ Central Memory                            | CD45+ CD3+ CD4+ CD8- CD45RA+ CCR7-      |
|                                                | CD4+ Naïve                                     | CD45+ CD3+ CD4+ CD8- CD45RA- CCR7+      |
|                                                | CD4+ Effector Memory                           | CD45+ CD3+ CD4+ CD8- CD45RA- CCR7-      |
|                                                | CD4+ Effector                                  | CD45+ CD3+ CD4+ CD8- CD45RA+ CCR7-      |
|                                                | CD4+ CD69+                                     | CD45+ CD3+ CD4+ CD8- CD69+              |
|                                                | CD4+ Naïve CD69+                               | CD45+ CD3+ CD4+ CD8- CD45RA+ CD69+      |
|                                                | CD4+ CD38+                                     | CD45+ CD3+ CD4+ CD8- CD38+              |
|                                                | CD4+ Naïve CD38+                               | CD45+ CD3+ CD4+ CD8- CD45RA+ CD38+      |
|                                                | CD4+ HLA-DR+                                   | CD45+ CD3+ CD4+ CD8- HLA-DR+            |
|                                                | CD4+ Naïve HLA-DR+                             | CD45+ CD3+ CD4+ CD8- CD45RA+ HLA-DR+    |
|                                                | CD8+ Central Memory                            | CD45+ CD3+ CD4- CD8+ CD45RA+ CCR7-      |
|                                                | CD8+ Naïve                                     | CD45+ CD3+ CD4- CD8+ CD45RA- CCR7+      |
|                                                | CD8+ Effector Memory                           | CD45+ CD3+ CD4- CD8+ CD45RA- CCR7-      |
|                                                | CD8+ Effector                                  | CD45+ CD3+ CD4- CD8+ CD45RA+ CCR7-      |
|                                                | CD8+ CD69+                                     | CD45+ CD3+ CD4- CD8+ CD69+              |
|                                                | CD8+ Naïve CD69+                               | CD45+ CD3+ CD4- CD8+ CD45RA+ CD69+      |
|                                                | CD8+ CD38+                                     | CD45+ CD3+ CD4- CD8+ CD38+              |
|                                                | CD8+ Naïve CD38+                               | CD45+ CD3+ CD4- CD8+ CD45RA+ CD38+      |
|                                                | CD8+ HLA-DR+                                   | CD45+ CD3+ CD4- CD8+ HLA-DR+            |
|                                                | CD8+ Naïve HLA-DR+                             | CD45+ CD3+ CD4- CD8+ CD45RA+ HLA-DR+    |
|                                                | CD4+ Ratio of Lag3+/Lag3-                      | Manually calculate value                |
|                                                | CD8+ Ratio of Lag3+/Lag3-                      | Manually calculate value                |
|                                                | CD4+ Ratio of Naïve/Effector                   | Manually calculate value                |
|                                                | CD4+ Ratio of Central Memory / Effector Memory | Manually calculate value                |
|                                                | CD4+ Ratio of Naïve / Central Memory           | Manually calculate value                |
|                                                | CD4+ Ratio of Effector / Effector Memory       | Manually calculate value                |
|                                                | CD8+ Ratio of Naïve/Effector                   | Manually calculate value                |
| CD8+ Ratio of Central Memory / Effector Memory | Manually calculate value                       |                                         |
| CD8+ Ratio of Naïve / Central Memory           | Manually calculate value                       |                                         |
| CD8+ Ratio of Effector / Effector Memory       | Manually calculate value                       |                                         |

## Materials and Methods:

Analysis of the exploratory endpoints was undertaken at Cytel Inc (Waltham, MA). Biomarker venous sampling (e.g. from the patient) was performed during screen A, screen B, pre-dose baseline and days 1, 3, 7, 14, 21, and 28 visits. A ratio of concentrations from post treatment start at each timepoint to baseline, (value/baseline) was generated. Ratios were then log-transformed to approach a more normal distribution. Cmax was defined as the maximum ratio of value/baseline observed over the sampling duration.

The area under the curve (AUC) was generated using the linear trapezoid rule between baseline (Day -1) and each day after the end of treatment, starting with Day 1 (one day after the end of treatment). AUC designations were marked with the number of days after the end of treatment to which the AUC corresponds (i.e., AUC3 was the designation of the AUC from baseline to three days after the end of treatment). Time-weighted averages were then generated by dividing each AUC by the interval of time represented (2 days for AUC1, 4 days for AUC3, etc). For TWAs, the standard effect sizes were the mean difference between IP-treated and Sham treated TWAs divided by the pooled standard deviation.

### *Standardization of Biomarker Effects:*

Because of differences in scale, Z scores from discrete biomarkers were used to standardize data from the desired biomarkers prior to pooling the data into single aggregate endpoints. Z-scores were obtained for each discrete parameter and timepoint endpoint as follows:

$$Z \text{ score} = (x - \text{mean (across all subjects)}) / \text{sd across all subjects), eq.1}$$

where x was the observed value, mean was the mean of observed values across all subjects, and sd was the standard deviation of observed values across all subjects.

Next, effect sizes were computed as:

$$\text{Effect Size} = \text{mean}_{\text{TRT}} - \text{mean}_{\text{CNT}} / \text{pooled sd, eq. 2}$$

where mean<sub>TRT</sub> and mean<sub>CNT</sub> are the mean values for the treated group and the control groups, respectively; and where sd was the pooled standard deviation. The treatment effect directions for each biomarker were assigned such that a positive effect size indicated a positive change was observed and a negative effect size indicated a negative change.

Subsequently, the Z scores are multiplied by -1 or +1 according to the biological effect direction. Thus, if a negative effect is believed to indicate efficacy, negative effects will be converted into positive Z-scores and positive effects into negative Z-scores. Because of this standardization, biomarkers with anticipated changes in opposing directions may have been pooled appropriately, where increasing positive Z-scores indicate increases in desired biological activity and negative Z-scores indicate less desired biological activity.

### *Identification of Contending Biomarkers:*

Absolute values of effect sizes were generated for each biomarker. A biomarker was considered a contender if the absolute value for the effect size was greater than or equal to one for both ratios of log-transformed values over baseline and TWA.

### *Composite Generation:*

For each subject, a Composite Z score was computed. Composite Z scores were the average Z score across markers within a composite group (defined in section 2.3 above), for each subject and timepoint. Groupings were created based on both the magnitude of effect size (as shown in the first method) as well as the scientific plausibility of each combination. Although subjective, this approach was hoped to circumvent the likelihood of erroneous groupings due to small sample sizes, as well as to exclude the possibility of focusing on biomarkers unlikely to translate into clinical relevance.

Once composite scores were generated for each subject, composite endpoints were generated for each treatment group by averaging the individual composite Z-scores in each group. Finally, composite endpoints were used to generate composite effect sizes, calculated as the difference between treated and control composite endpoints divided by the pooled standard deviation.
